# Supplementary material for: Hypomethylating Agent Azacitidine Is Effective in Treating Brain Metastasis Triple-Negative Breast Cancer Through Regulation of DNA Methylation of Keratin 18 Gene
Source: PubMed Central journal article supplement (PMC7225776; doi:10.1016/j.tranon.2020.100775), 2020-05-11
Supplement: mmc1.pdf [file mmc1.pdf]

Supp. Fig. 1

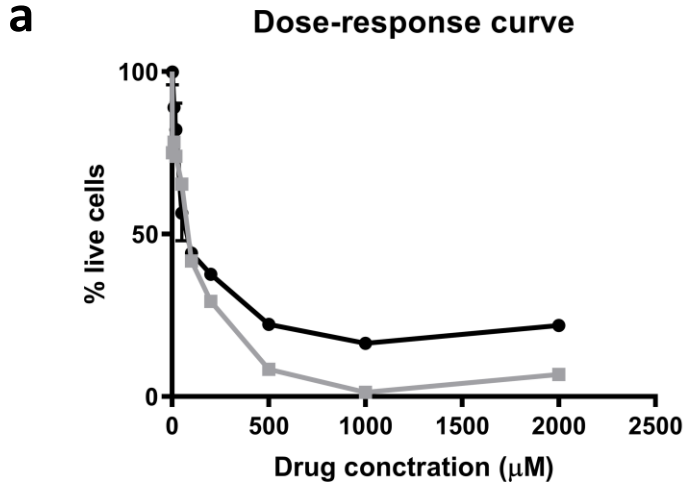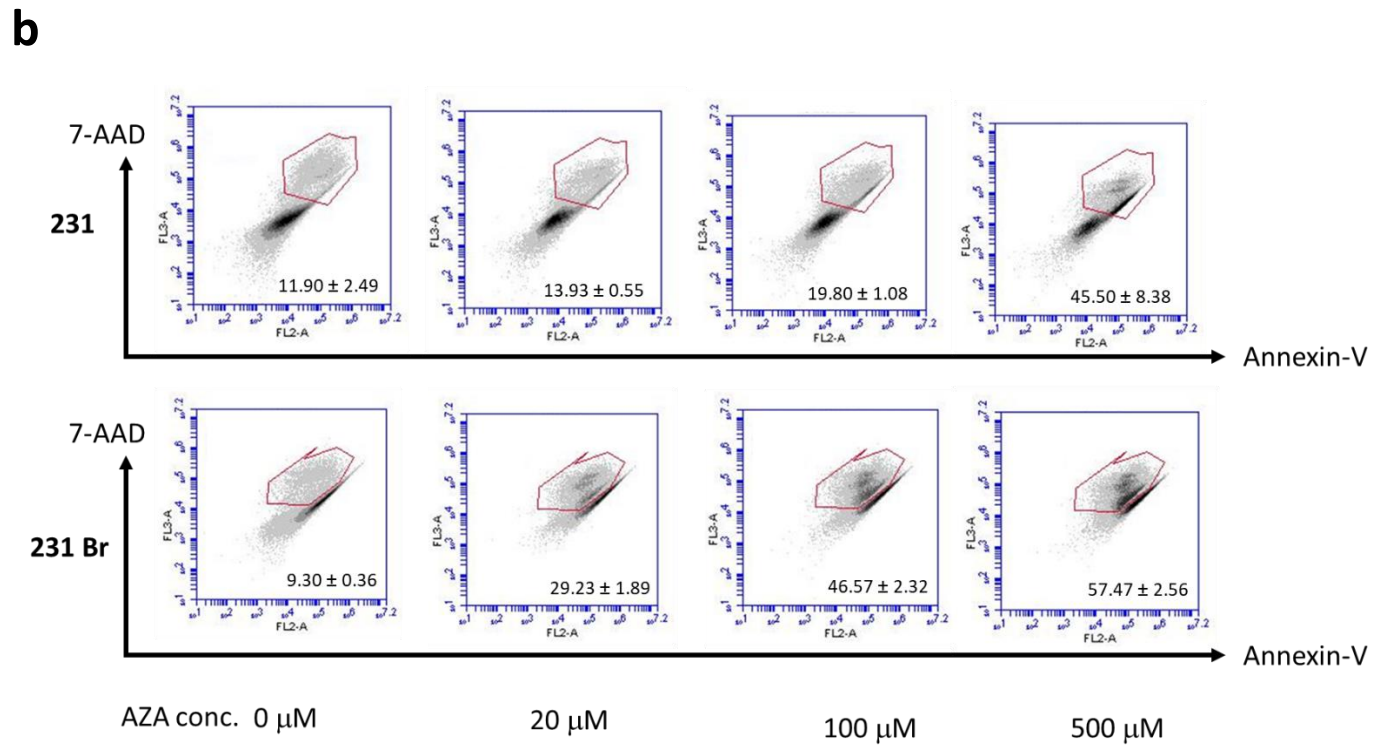

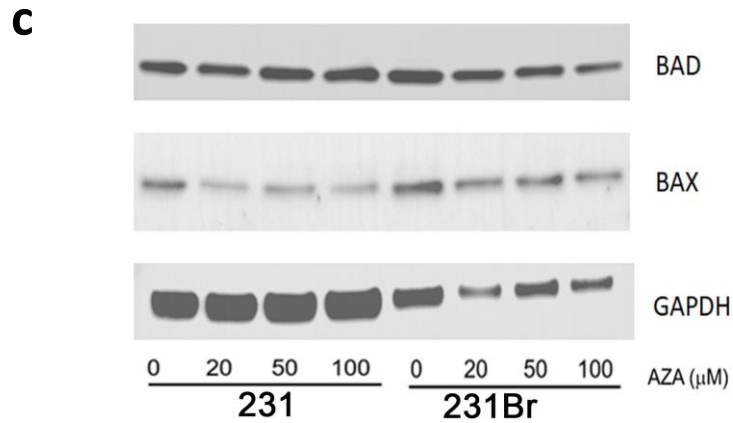

**Supp. Fig. 1. Brain metastasized breast cancer cells (231Br) have different response to AZA treatment compared to their parental regular breast cancer 231 cells.** (a) Dose-response curve used to calculate IC 50 values of AZA in 231 and 231Br cells ( $p < 0.01$ ). The figure represents  $N = 3$  technical replicates, three independent experiments. (b) Flow cytometry plot for the detection of percentage of Annexin-V positive cells after various concentrations of AZA treatment for 3 days. The Annexin-V positive cells were gated based on unstained negative control and Annexin-V only stain positive control cells. The plot represents  $N = 3$  technical replicates, two independent experiments. (b) Expression of BAD and BAX in 231 and 231Br cells after AZA treatment for 3 days measured by Western blotting assay. GAPDH was used as the loading control. The blots shown are a presentation of two independent experiments.

Supp. Fig. 2

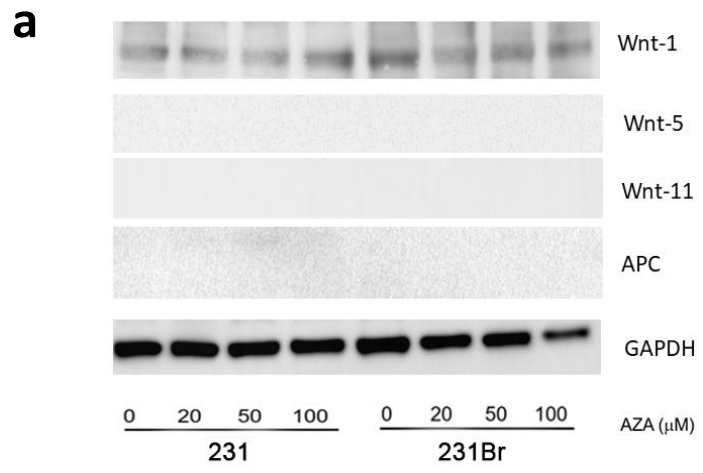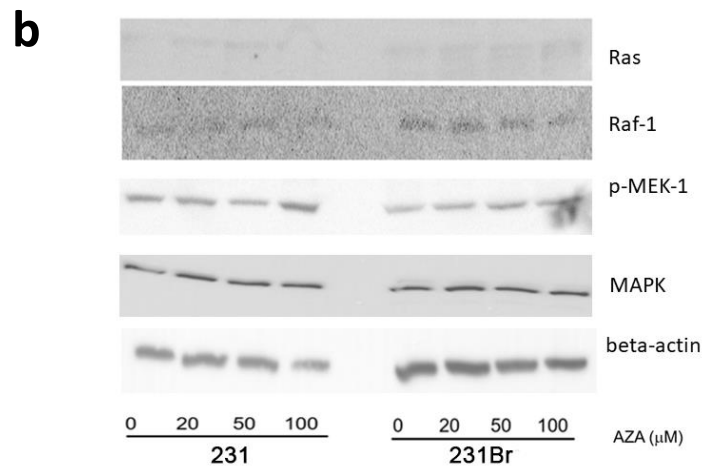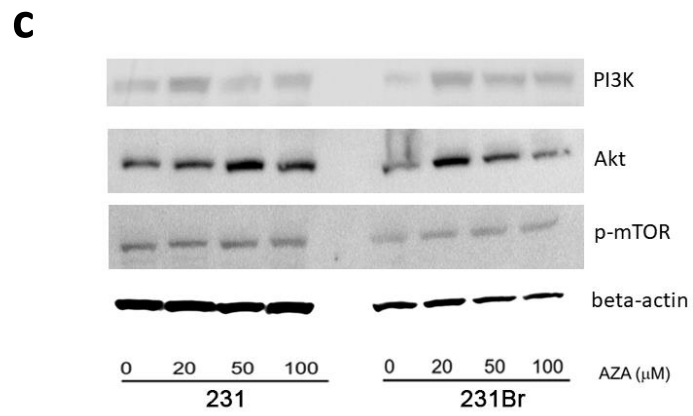

**Supp. Fig. 2. Inhibition of Wnt, Ras-Raf-MEK-MAPK, PI3K-Akt-mTOR signaling transduction pathways by AZA in two cells lines.** (a) Expression of Wnt-1, Wnt-5, Wnt-11, and APC in 231 and 231Br cells after AZA treatment for 3 days measured by Western blotting assay. GAPDH was used as the loading control. The blots shown are a presentation of two independent experiments. (b) Expression of Ras, Raf-1, phosphorylated MEK-1, and MAPK in 231 and 231Br cells after AZA treatment for 3 days measured by Western blotting assay. Beta-actin was used as the loading control. The blots shown are a presentation of two independent experiments. (c). Expression of PI3K, Akt, and phosphorylated mTOR in 231 and 231Br cells after AZA treatment for 3 days measured by Western blotting assay. Beta-actin was used as the loading control. The blots shown are a presentation of two independent experiments.

Supp. Fig. 3

**a**

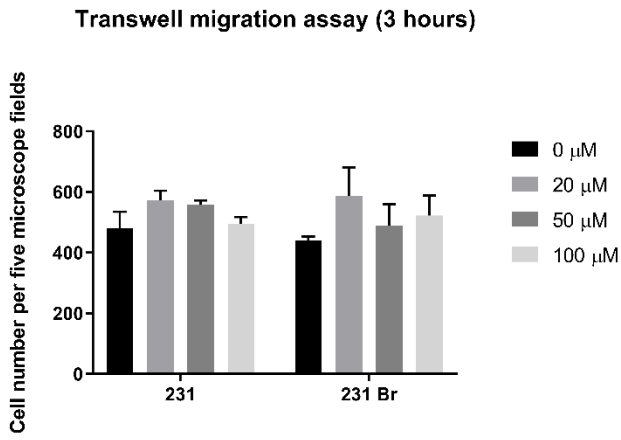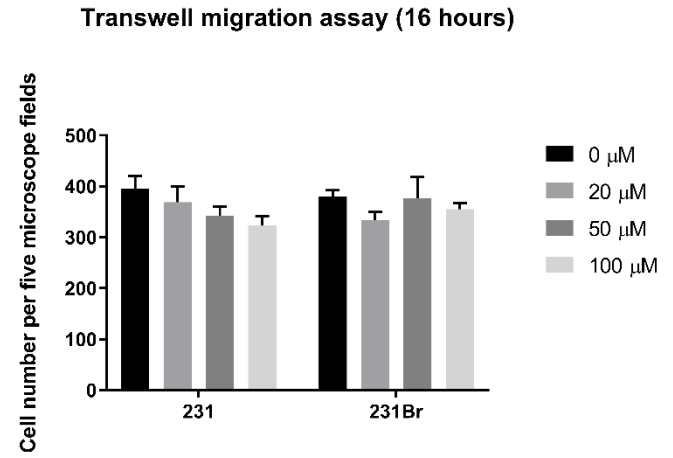

**b**

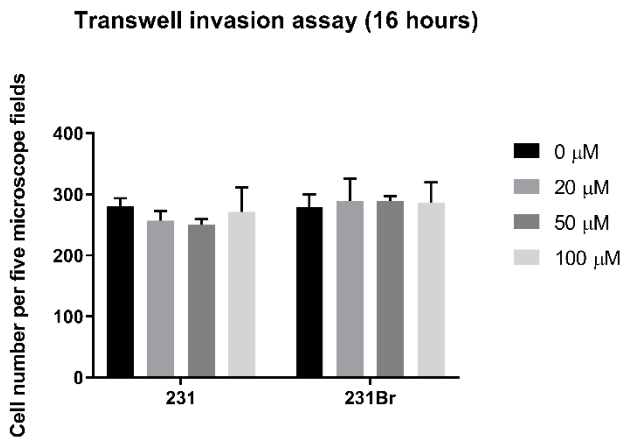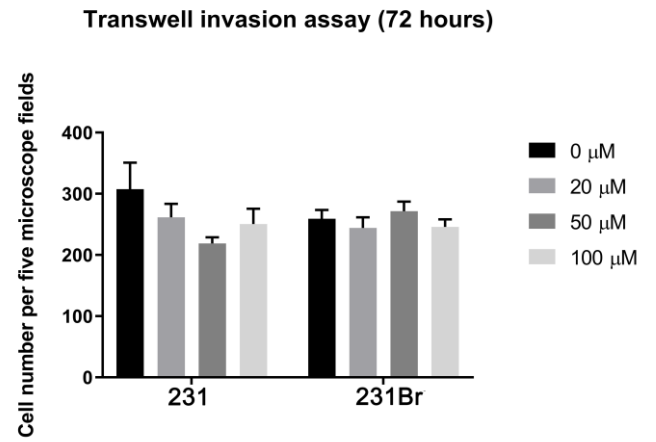

C

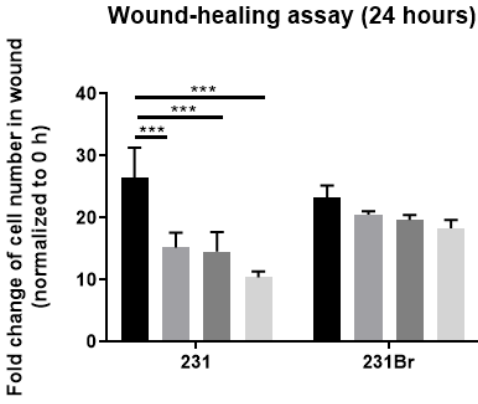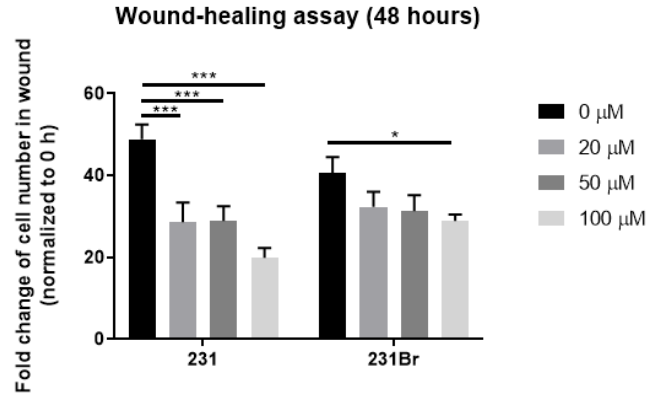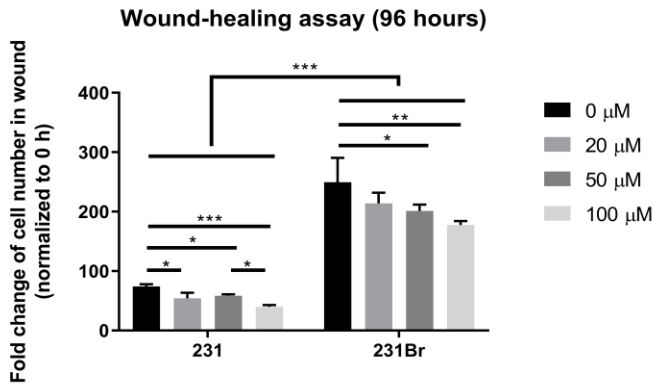

**d**

Wound-healing assay 231 cells

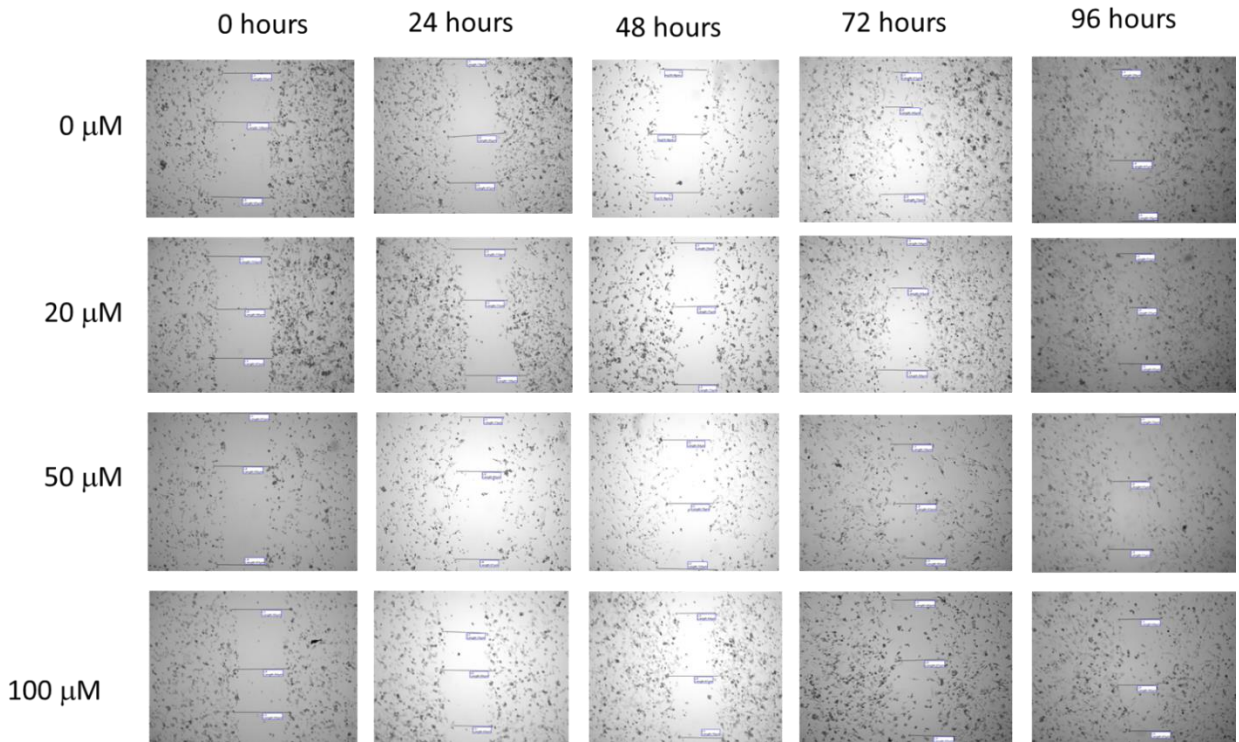**e**

Wound-healing assay 231Br cells

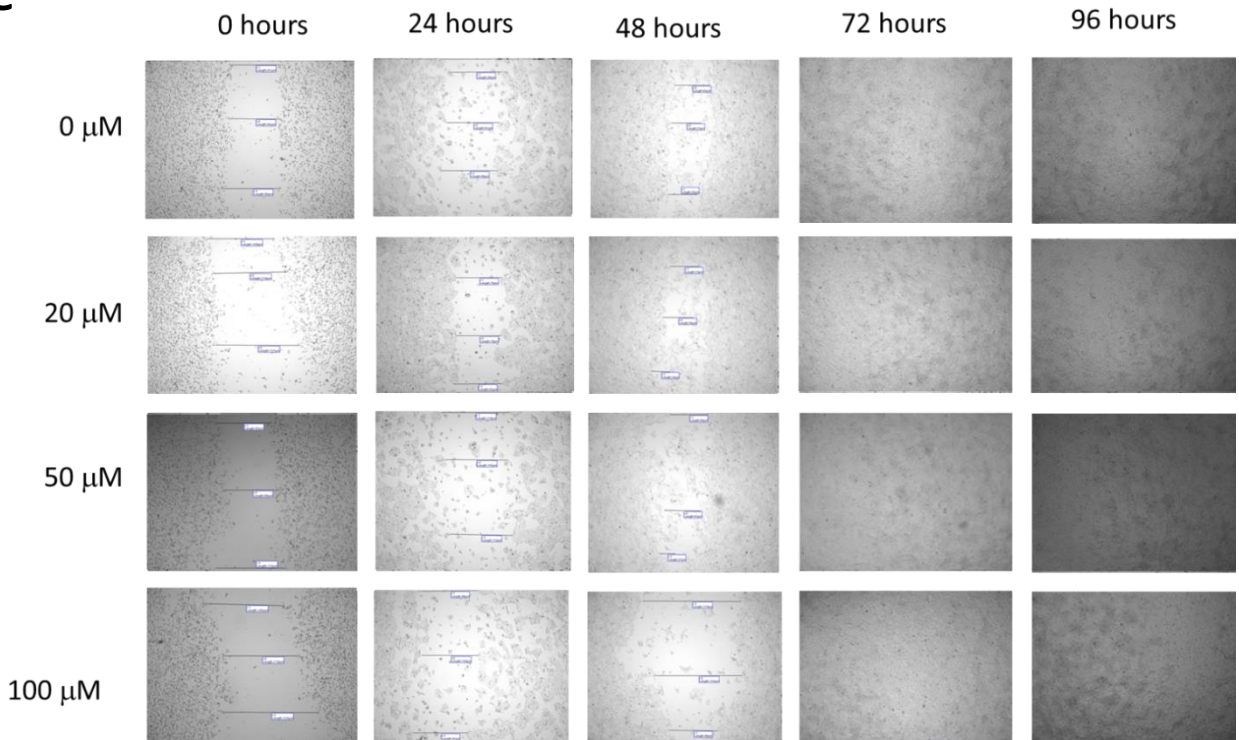

**Supp. Fig. 3. Brain colonizing cells have higher migration and invasion potential compared to regular breast cancer cells.** (a) Quantification of cells migrating across transwells 3 and 16 hours after plating cells in the migration chambers measured by transwell migration assay. Y-axis stands for the average number of cell migration per 5 microscope fields. All error bars represent standard deviation (SD), representative of two independent experiments. (b) Quantification of cells migrating across transwells 16 and 72 hours after plating cells in the Matrigel coated migration chambers measured by transwell invasion assay. Y-axis stands for the average number of cell migration per 5 microscope fields. All error bars represent standard deviation (SD), representative of two independent experiments. (c) Quantification of cells presented in the scratch made on day 0 (0 hour time point) at 24, 48, and 96 hours after AZA treatment by wound-healing assay. Cell numbers in the scratch wound were normalized to 0 hour. All error bars represent standard deviation (SD), representative of two independent experiments. \* $p < 0.05$ , \*\* $p < 0.01$ , \*\*\* $p < 0.001$ . (d) Width of the scratch wound made on day 0 measured at 0, 24, 48, 72 and 96 hours in 231 and 231Br cells with AZA treatment. The images represent N = 3 technical replicates, two independent experiments. (e) Representative microscopic images of the wound area migrated by 231 cells treated by different concentration of AZA at different time points. The width of the wound was measured and labelled with scale. (f) Representative microscopic images of the wound area migrated by 231Br cells treated by different concentration of AZA at different time points. The width of the wound was measured and labelled with scale.



Supp. Fig. 4

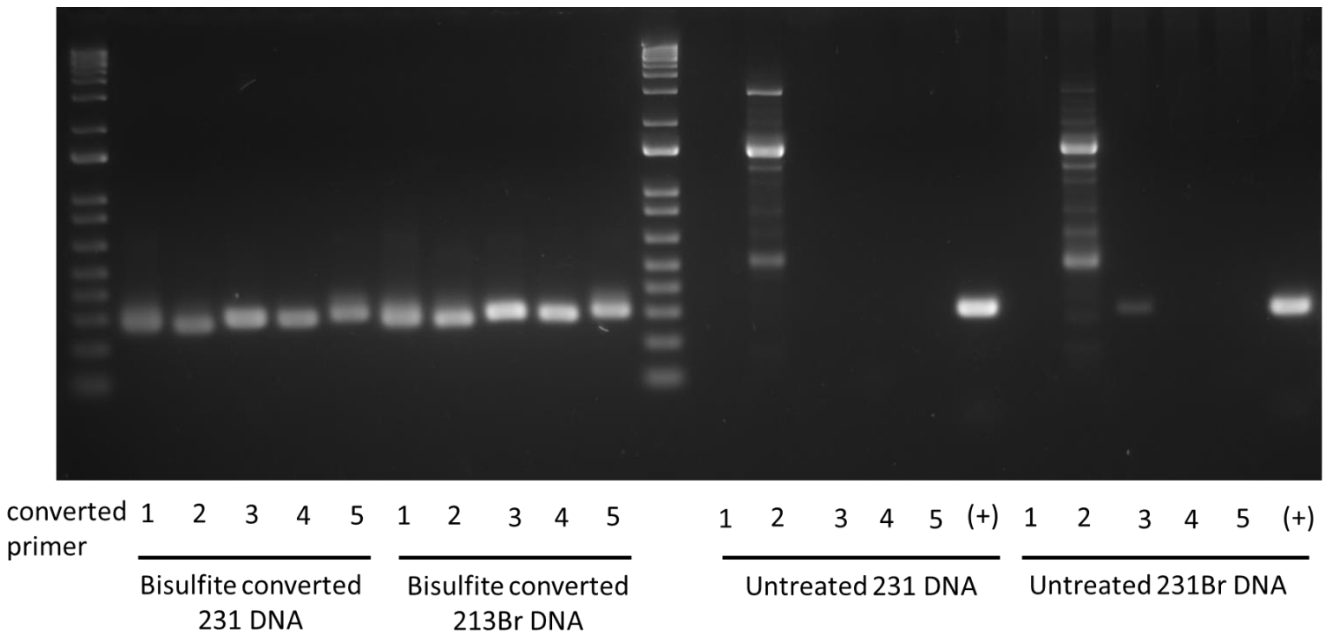

**Supp. Fig. 4. Five pairs of primers were designed and used to amplify the bisulfite modified intron 1 region of keratin 18 gene by PCR.** In order to measure and compare the DNA methylation of the keratin 18 gene in both cell lines, five pairs of primers (converted primer 1-5) were designed and used to fully cover and amplify the bisulfite modified intron 1 region of keratin 18 gene by PCR. Each of the five pairs of primers yielded a single and clear PCR band using bisulfite converted genomic DNA as the template from both MDA-MB-231 and MDA-MB-231 Br cell lines. Each of the five pairs of primers could not yielded a single and clear PCR band using regular (non-bisulfite converted) genomic DNA as the template from both cell lines.

**Supp. Table 1. Information of the antibodies used in Western blotting assays**

| <b>Antibody name (clone)</b> | <b>Manufacture</b>       | <b>Catalog number</b> |
|------------------------------|--------------------------|-----------------------|
| Bcl-2 (C-2)                  | Santa Cruz biotechnology | sc7382                |
| Bcl-xL (H-5)                 | Santa Cruz biotechnology | sc8392                |
| Caspase-3 (E-8)              | Santa Cruz biotechnology | sc7272                |
| Caspase-9 p35 (A-9)          | Santa Cruz biotechnology | sc133109              |
| beta actin (AC-15)           | Sigma-Aldrich            | A5441                 |
| Bad (C-7)                    | Santa Cruz biotechnology | sc8044                |
| Bax (6A7)                    | Santa Cruz biotechnology | sc23959               |
| GAPDH (14C10)                | Cell signaling           | 14C10                 |
| Wnt-1 (E-10)                 | Santa Cruz biotechnology | sc514531              |
| Wnt-3 (3A6)                  | Santa Cruz biotechnology | sc136163              |
| Wnt-4 (B-6)                  | Santa Cruz biotechnology | sc376279              |
| Wnt-5 (A-5)                  | Santa Cruz biotechnology | sc365370              |
| Wnt-11 (C-8)                 | Santa Cruz biotechnology | sc365032              |
| APC (F-3)                    | Santa Cruz biotechnology | sc9998                |
| GSK-3alpha/beta (0011-A)     | Santa Cruz biotechnology | sc7291                |
| Phosphorylated GSK-3         | Cell signaling           | 9331                  |
| beta catenin (E-5)           | Santa Cruz biotechnology | sc7963                |
| Phospho-beta-catenin         | Invitrogen               | PA5-17915             |
| pan-Ras (F132)               | Santa Cruz biotechnology | sc32                  |
| Raf-1 (E-10)                 | Santa Cruz biotechnology | sc7267                |
| p-MEK-1 (47.Ser 222)         | Santa Cruz biotechnology | sc136542              |
| ERK 1 (G-8) / MAPK           | Santa Cruz biotechnology | sc271269              |
| PI 3-kinase p85alpha (C1)    | Santa Cruz biotechnology | sc376112              |
| Akt1 (B-1)                   | Santa Cruz biotechnology | sc5298                |
| p-mTOR (59.Ser 2448)         | Santa Cruz biotechnology | sc293133              |
| HIF-1alpha (H-206)           | Santa Cruz biotechnology | sc10790               |
| VEGF (C-1)                   | Santa Cruz biotechnology | sc7269                |
| VEGF receptor 1              | R&D Systems              | 49560                 |
| VEGF receptor 2              | R&D Systems              | AF357                 |
| TGF beta (3C11)              | Santa Cruz biotechnology | sc130348              |
| MMP-2                        | ABCam                    | ab37150               |
| MMP-7                        | ABCam                    | ab5706                |
| MMP-9 (2C3)                  | Santa Cruz biotechnology | sc21733               |
| Vimentin (V9)                | Santa Cruz biotechnology | sc6260                |
| N-cadherin (13A9)            | Santa Cruz biotechnology | sc59987               |
| E-cadherin (G-10)            | Santa Cruz biotechnology | sc8426                |
| pan-Cytokeratin (AE1/AE3)    | Santa Cruz biotechnology | sc81714               |
| Keratin 18 (E431-1)          | ABCam                    | ab32118               |
| DNMT3a (C-12)                | Santa Cruz biotechnology | sc365769              |
| DNMT3b (G-9)                 | Santa Cruz biotechnology | sc376043              |

Supp. Table 2. Quantification of Western blotting images by densitometry

Fig. 2c.

|                             | 231  |      |      |      | 231Br |      |      |      |
|-----------------------------|------|------|------|------|-------|------|------|------|
| AZA conc.( $\mu$ M)         | 0    | 20   | 50   | 100  | 0     | 20   | 50   | 100  |
| BCL-2/beta-actin            | 0.43 | 0.61 | 0.83 | 0.63 | 0.69  | 0.46 | 0.42 | 0.31 |
| Normalized to 0 $\mu$ M AZA | 1    | 1.40 | 1.93 | 1.46 | 1     | 0.67 | 0.61 | 0.44 |

Fig. 2d.

|                                           | 231  |      |      |      | 231Br |      |      |      |
|-------------------------------------------|------|------|------|------|-------|------|------|------|
| AZA conc.( $\mu$ M)                       | 0    | 20   | 50   | 100  | 0     | 20   | 50   | 100  |
| Procaspase 9 (upper band)/beta-actin      | 0.63 | 0.89 | 0.68 | 0.79 | 0.94  | 1.03 | 1.11 | 1.92 |
| Normalized to 0 $\mu$ M AZA               | 1    | 1.40 | 1.08 | 1.24 | 1     | 1.10 | 1.17 | 2.04 |
|                                           |      |      |      |      |       |      |      |      |
| Cleaved caspase 9 (lower band)/beta-actin | 1.02 | 1.12 | 0.93 | 2.31 | 0.91  | 1.26 | 1.28 | 1.38 |
| Normalized to 0 $\mu$ M AZA               | 1    | 1.09 | 0.91 | 2.25 | 1     | 1.38 | 1.41 | 1.51 |
|                                           |      |      |      |      |       |      |      |      |
| AZA conc.( $\mu$ M)                       | 0    | 20   | 50   | 100  | 0     | 20   | 50   | 100  |
| Caspase 3 /beta-actin                     | 1.14 | 1.24 | 1.32 | 1.25 | 0.72  | 0.73 | 0.97 | 1.07 |
| Normalized to 0 $\mu$ M AZA               | 1    | 1.08 | 1.15 | 1.10 | 1     | 1.01 | 1.35 | 1.48 |

**Fig. 3a.**

|                                                      | <b>231</b> |           |           |            | <b>231Br</b> |           |           |            |
|------------------------------------------------------|------------|-----------|-----------|------------|--------------|-----------|-----------|------------|
| <b>AZA conc.(<math>\mu</math>M)</b>                  | <b>0</b>   | <b>20</b> | <b>50</b> | <b>100</b> | <b>0</b>     | <b>20</b> | <b>50</b> | <b>100</b> |
| <b>Wnt-3/<br/>GAPDH</b>                              | 1.11       | 0.65      | 0.71      | 0.56       | 0.83         | 0.85      | 0.24      | 0.22       |
| <b>Normalized<br/>to 0 <math>\mu</math>M<br/>AZA</b> | 1          | 0.58      | 0.64      | 0.50       | 1            | 1.02      | 0.29      | 0.25       |
|                                                      |            |           |           |            |              |           |           |            |
| <b>Wnt-4/<br/>GAPDH</b>                              | 0.28       | 0.68      | 0.67      | 0.066      | 1.56         | 1.06      | 1.05      | 0.18       |
| <b>Normalized<br/>to 0 <math>\mu</math>M<br/>AZA</b> | 1          | 2.43      | 2.39      | 0.23       | 1            | 0.68      | 0.68      | 0.11       |
|                                                      |            |           |           |            |              |           |           |            |
| <b>GSK-3<br/>(upper<br/>band)/<br/>GAPDH</b>         | 0.52       | 0.64      | 0.55      | 0.23       | 1.11         | 0.99      | 0.86      | 0.23       |
| <b>Normalized<br/>to 0 <math>\mu</math>M<br/>AZA</b> | 1          | 1.21      | 1.04      | 0.43       | 1            | 0.89      | 0.78      | 0.21       |
|                                                      |            |           |           |            |              |           |           |            |
| <b>GSK-3<br/>(lower<br/>band)/<br/>GAPDH</b>         | 0.66       | 0.68      | 0.58      | 0.21       | 1.09         | 0.85      | 0.56      | 0.27       |
| <b>Normalized<br/>to 0 <math>\mu</math>M<br/>AZA</b> | 1          | 1.02      | 0.87      | 0.32       | 1            | 0.78      | 0.51      | 0.24       |
|                                                      |            |           |           |            |              |           |           |            |
| <b>Beta-<br/>catenin/<br/>GAPDH</b>                  | 1.30       | 1.38      | 1.12      | 0.54       | 1.38         | 1.19      | 1.28      | 0.77       |
| <b>Normalized<br/>to 0 <math>\mu</math>M<br/>AZA</b> | 1          | 1.06      | 0.85      | 0.41       | 1            | 0.86      | 0.92      | 0.55       |



|                                              |      |      |      |      |      |      |      |      |
|----------------------------------------------|------|------|------|------|------|------|------|------|
| <b>Pan-cytokeratin/<br/>GAPDH</b>            | 1.27 | 1.20 | 1.05 | 0.99 | 0.40 | 0.39 | 0.17 | 0.11 |
| <b>Normalized to 0 <math>\mu</math>M AZA</b> | 1    | 0.94 | 0.82 | 0.77 | 1    | 0.97 | 0.43 | 0.26 |

**Fig. 5a.**

|                                              | <b>231</b> |           |           |            | <b>231Br</b> |           |           |            |
|----------------------------------------------|------------|-----------|-----------|------------|--------------|-----------|-----------|------------|
| <b>AZA conc.(<math>\mu</math>M)</b>          | <b>0</b>   | <b>20</b> | <b>50</b> | <b>100</b> | <b>0</b>     | <b>20</b> | <b>50</b> | <b>100</b> |
| <b>Keratin 18/<br/>GAPDH</b>                 | 0.71       | 1.06      | 0.75      | 0.96       |              |           |           |            |
| <b>Normalized to 0 <math>\mu</math>M AZA</b> | 1          | 1.48      | 1.06      | 1.35       |              |           |           |            |

**Fig. 5f.**

|                                              | <b>231</b> |           |           |            | <b>231Br</b> |           |           |            |
|----------------------------------------------|------------|-----------|-----------|------------|--------------|-----------|-----------|------------|
| <b>AZA conc.(<math>\mu</math>M)</b>          | <b>0</b>   | <b>20</b> | <b>50</b> | <b>100</b> | <b>0</b>     | <b>20</b> | <b>50</b> | <b>100</b> |
| <b>DNMT3a/<br/>GAPDH</b>                     |            |           |           |            | 1.64         | 0.82      | 0.96      | 0.91       |
| <b>Normalized to 0 <math>\mu</math>M AZA</b> |            |           |           |            | 1            | 0.51      | 0.58      | 0.56       |
